# Supplementary material for: Electrocatalytic synthesis of adipic acid coupled with H2 production enhanced by a ligand modification strategy
Source: PubMed Central journal article supplement (PMC9411531; doi:10.1038/s41467-022-32769-0), 2022-08-25
Supplement: 41467_2022_32769_MOESM2_ESM.pdf [file 41467_2022_32769_MOESM2_ESM.pdf]

### **Description of Additional Supplementary Files**

File Name: Supplementary Movie 1

Description: The total time sequence of cyclohexanone diffusion in Ni(OH)<sub>2</sub>.

File Name: Supplementary Movie 2

Description: The total time sequence of cyclohexanone diffusion in Ni(OH)<sub>2</sub>-SDS.
